# Supplementary material
Source: publisher site journal article supplement (https://www.dovepress.com/article/453327)
Supplement: Supplementary file 1 [file get_supplementary_file.php]

**Supplementary**

The main drugs involved in this study

1. Penehyclidine hydrochloride injection (1ml:1mg)

Liaoning Avanc Pharmaceutical Co Ltd, China

1. Lidocaine hydrochloride injection (5ml:100mg)

Jiangsu Yuexing Pharmaceutical Co Ltd, China

1. Etomidate Fat Emulsion Injection (10ml:20mg)

Jiangsu Nhwa Pharmaceutical Co Ltd , China

1. Sufentanil Citrate Injection (1ml:50μg)

Hubei Yichang Renfu Pharmaceutical Co Ltd, China

1. Remifentanil Hydrochloride for Injection (2mg)

Hubei Yichang Renfu Pharmaceutical Co Ltd, China

1. Sevoflurane (120ml)

Shanghai Hengrui Pharmaceutical Co Ltd, China

1. Cisatracurium Besilate for Injection  (5mg)

Shangyao Dongying Jiangsu Pharmaceutica Co Ltd , China

1. Ondansetron Hydrochloride Injection (2ml:2mg)

Beijing Shiqiao Biopharmaceutical Co Ltd , China

1. Propofol Emulsion Injection (50ml:500mg)

Beijing Fresenius Kabi Austria GmbH Pharmaceutical Group Co Ltd , China

1. Dexamethasone Sodium Phosphate Injection

Shandong Chenxin Pharmaceutical Co Ltd , China

1. Norepinephrine Hydrochloride (1ml:2mg)

Wuhan Yuanda Pharmaceutical Co Ltd , China

1. Atropine Sulfate Injection (1ml:0.5mg)

Tianjin Jinyao Pharmaceutical Co Ltd , China

1. Ephedrine Hydrochloride Injection (1ml:30mg)

Shenyang First Pharmaceutical Co Ltd , China

1. Rocuammonium bromide Injection (5ml:10mg)

Guangdong Xinghao Pharmaceutical Group Co Ltd , China

1. Compound Sodium Chlorjde Injection (500ml)

Anhui BBC Pharmaceutical Co Ltd, China

1. Sodium Potassium Magnesium Calcium and Glucose Injection (500ml)

Jiangsu Hengrui Pharmaceutical Co Ltd, China

1. Hydroxyethyl Starch 130/0.4 and Sodium Chloride Injection (500ml)

Beijing Fresenius Kabi Austria GmbH Pharmaceutical Group Co Ltd , China
